# Supplementary figures and images for: Formaldehyde and De/Methylation in Age-Related Cognitive Impairment
Source: MDPI journal article supplement (doi:10.3390/genes12060913), 2021-06-13

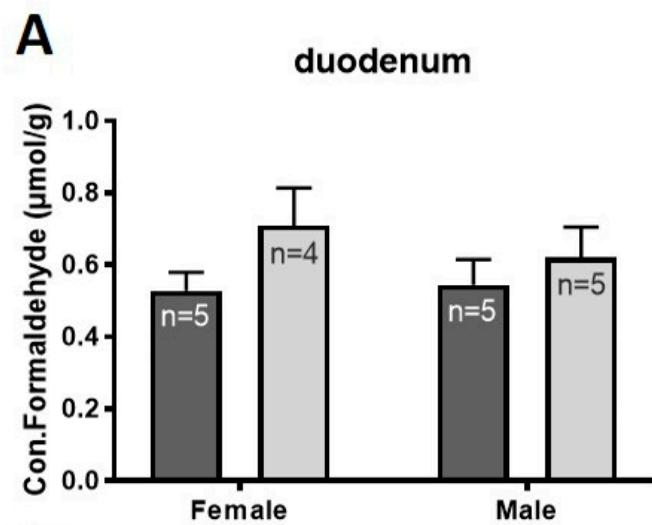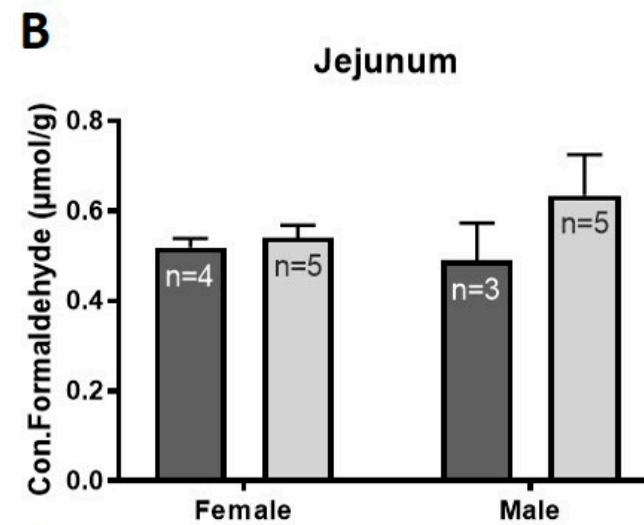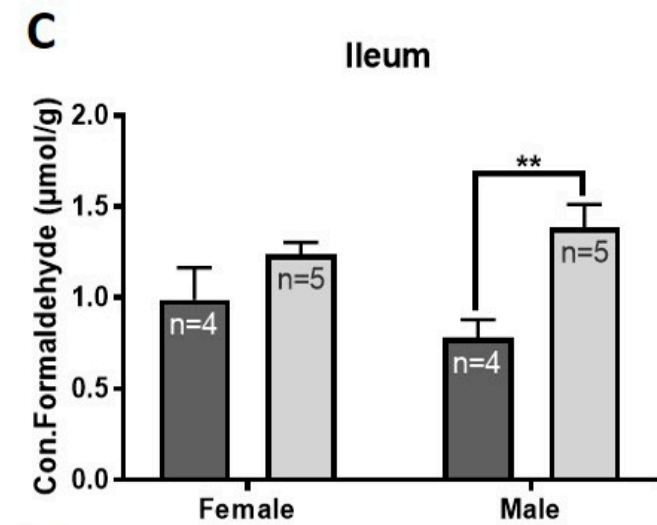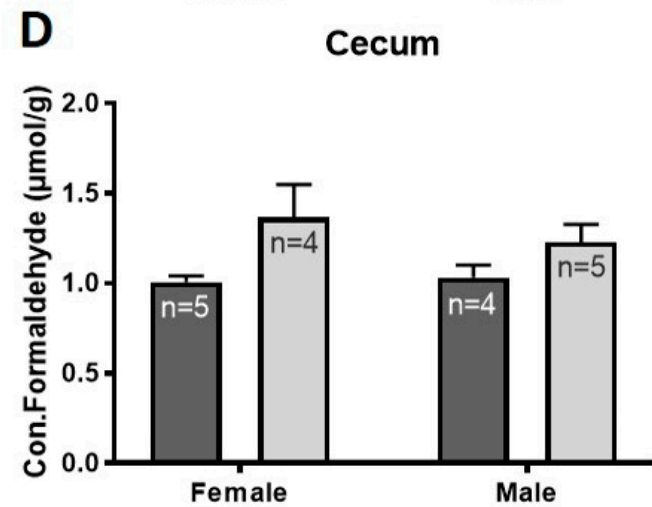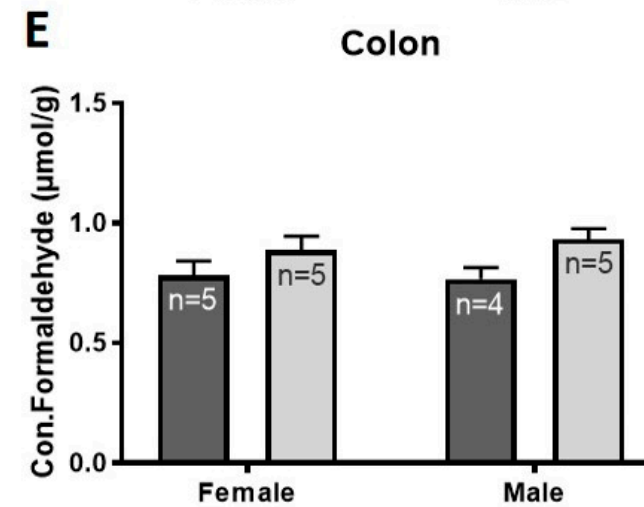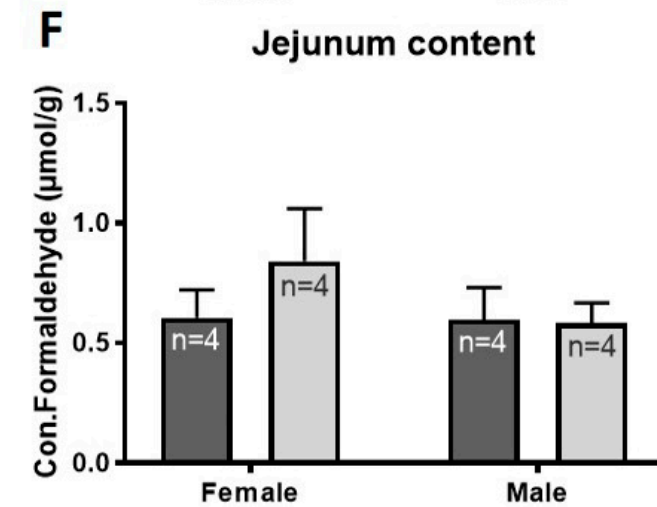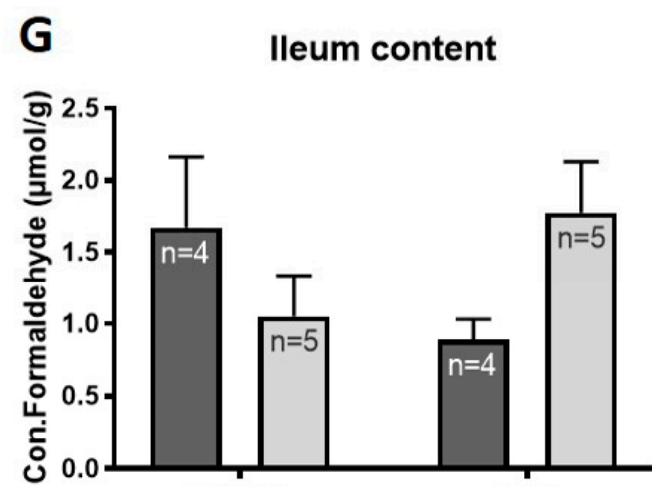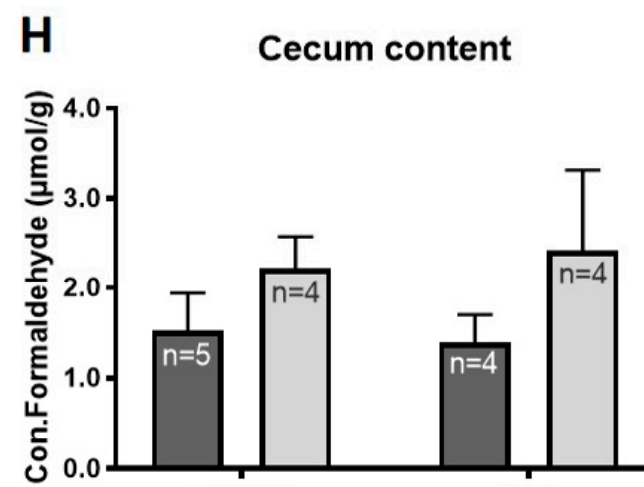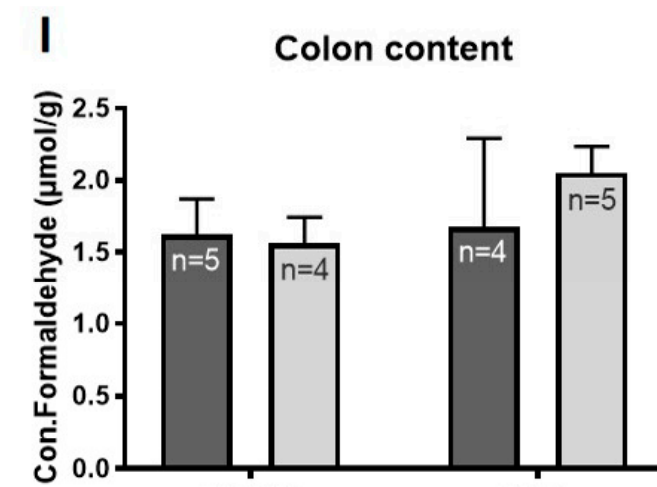

Supplement: s1 [file s1]
